# Supplementary material
Source: PubMed Central journal article supplement (PMC6220363)
Supplement: pr8b00455_si_001.pdf [file pr8b00455_si_001.pdf]

## Supporting Information

### **<sup>1</sup>H NMR metabolomics identifies underlying inflammatory pathology in osteoarthritis and rheumatoid arthritis synovial joints**

James R Anderson<sup>1†</sup>, Susama Chokesuwattanaskul<sup>2,3†</sup>, Marie M Phelan<sup>2,4</sup>, Tim JM Welting<sup>5</sup>, Lu-Yun Lian<sup>2</sup>, Mandy J Peffers<sup>1</sup>, Helen L Wright<sup>1\*</sup>

<sup>1</sup>Institute of Ageing and Chronic Disease, University of Liverpool, Liverpool, UK

<sup>2</sup>Institute of Integrative Biology, University of Liverpool, Liverpool, UK

<sup>3</sup>Chulalongkorn University, Bangkok, Thailand

<sup>4</sup>HLS Technology Directorate, University of Liverpool, Liverpool, UK

<sup>5</sup>Laboratory for Experimental Orthopedics, Department of Orthopedic Surgery, Maastricht University Medical Centre, The Netherlands

\*corresponding author, †contributed equally

Correspondence Address: Dr Helen Wright, William Henry Duncan Building, Institute of Ageing and Chronic Disease, University of Liverpool, 6 West Derby Street, Liverpool, L7 8TX UK. Tel: 0151 795 4457. Email: hlwright@liverpool.ac.uk

#### **Table of Contents**

Supplementary Table S1. List of 50 metabolites detected in OA and RA SF by <sup>1</sup>H NMR spectroscopy, assignment levels according to the Metabolomics Society Initiative [25].

Supplementary Table S1. List of 50 metabolites detected in OA and RA SF by <sup>1</sup>H NMR spectroscopy, assignment levels according to the Metabolomics Society Initiative(24).

| Class                                 | Metabolite name   | HMDB      | Assignment levels | Chemomx annotation (y/n) | Confirmed by in-house 1H (n = no standard available; y = present) | Observed in in-house 2D HSQC (n1 = no standard available; n2 = below level of detection; y = present) |
|---------------------------------------|-------------------|-----------|-------------------|--------------------------|-------------------------------------------------------------------|-------------------------------------------------------------------------------------------------------|
| <b><i>Amino Acids</i></b>             | 2-Aminobutyrate   | HMDB00650 | 2                 | y                        | n                                                                 | n1                                                                                                    |
|                                       | 5-Aminolevulinate | HMDB01149 | 2                 | y                        | n                                                                 | n1                                                                                                    |
|                                       | Alanine           | HMDB00161 | 1                 | y                        | y                                                                 | y                                                                                                     |
|                                       | Asparagine        | HMDB00168 | 2                 | y                        | n                                                                 | n2                                                                                                    |
|                                       | Creatine          | HMDB00064 | 1                 | y                        | y                                                                 | y                                                                                                     |
|                                       | Creatinine        | HMDB00562 | 1                 | y                        | y                                                                 | n2                                                                                                    |
|                                       | Glutamine         | HMDB00641 | 1                 | y                        | y                                                                 | y                                                                                                     |
|                                       | Glycine           | HMDB00123 | 1                 | y                        | y                                                                 | y                                                                                                     |
|                                       | Guanidoacetate    | HMDB00128 | 2                 | y                        | n                                                                 | n1                                                                                                    |
|                                       | Histidine         | HMDB00177 | 1                 | y                        | y                                                                 | n2                                                                                                    |
|                                       | Isoleucine        | HMDB00172 | 1                 | y                        | y                                                                 | y                                                                                                     |
|                                       | Leucine           | HMDB00687 | 1                 | y                        | y                                                                 | y                                                                                                     |
|                                       | Lysine            | HMDB00182 | 1                 | y                        | y                                                                 | y                                                                                                     |
|                                       | Methionine        | HMDB00696 | 1                 | y                        | y                                                                 | n2                                                                                                    |
|                                       | n-acetylaminoacid | -         | 3                 | y                        | n                                                                 | n1                                                                                                    |
|                                       | Ornithine         | HMDB00214 | 1                 | y                        | y                                                                 | n2                                                                                                    |
|                                       | Phenylalanine     | HMDB00159 | 1                 | y                        | y                                                                 | y                                                                                                     |
|                                       | Proline           | HMDB00162 | 1                 | y                        | y                                                                 | n2                                                                                                    |
|                                       | Sarcosine         | HMDB00271 | 2                 | y                        | n                                                                 | n2                                                                                                    |
|                                       | Threonine         | HMDB00167 | 1                 | y                        | y                                                                 | y                                                                                                     |
| Tyrosine                              | HMDB00158         | 1         | y                 | y                        | n2                                                                |                                                                                                       |
| Valine                                | HMDB00883         | 1         | y                 | y                        | y                                                                 |                                                                                                       |
| <b><i>Fatty and Organic Acids</i></b> | 2-Hydroxybutyrate | HMDB00729 | 2                 | y                        | n                                                                 | n1                                                                                                    |
|                                       | 3-Hydroxybutyrate | HMDB00357 | 2                 | y                        | n                                                                 | n1                                                                                                    |

|               |                             |           |   |   |   |    |
|---------------|-----------------------------|-----------|---|---|---|----|
|               | 3-Hydroxyisovalerate        | HMDB00754 | 2 | y | n | n1 |
|               | Acetate                     | HMDB00042 | 1 | y | y | y  |
|               | Acetoacetate                | HMDB00060 | 2 | y | n | n1 |
|               | Carnitine                   | HMDB00062 | 2 | y | n | n1 |
|               | Citrate                     | HMDB00094 | 1 | y | y | n2 |
|               | Formate                     | HMDB00142 | 2 | y | n | n1 |
|               | Lactate                     | HMDB00190 | 1 | y | y | y  |
|               | Malonate                    | HMDB00691 | 2 | y | n | n2 |
|               | Pyruvate                    | HMDB00243 | 1 | y | y | n2 |
|               | Taurine                     | HMDB00251 | 1 | y | y | n2 |
| <b>Sugars</b> | Acetylated-saccharide       | -         | 3 | y | y | y  |
|               | Glucose                     | HMDB00122 | 1 | y | y | y  |
|               | Glycerol                    | HMDB00131 | 1 | y | y | y  |
|               | Mannose                     | HMDB00169 | 1 | y | y | y  |
|               | Myoinositol                 | HMDB00211 | 1 | y | y | n2 |
| <b>Other</b>  | Acetylcholine               | HMDB00895 | 2 | y | n | n1 |
|               | Adenosine                   | HMDB00050 | 2 | y | n | n1 |
|               | Choline                     | HMDB00097 | 1 | y | y | y  |
|               | Dimethylamine               | HMDB00087 | 1 | y | y | y  |
|               | Ethanol                     | HMDB00108 | 1 | y | y | y  |
|               | Isopropanol                 | HMDB00863 | 2 | y | n | n1 |
|               | Mobile-lipid                | -         | 3 | y | n | n1 |
|               | o-Phosphocholine            | HMDB01565 | 2 | y | n | n2 |
|               | Oxypurinol                  | HMDB00086 | 2 | y | n | n1 |
|               | sn-Glycero-3-phosphocholine | HMDB00086 | 2 | y | n | n1 |
|               | Xanthine                    | HMDB00292 | 2 | y | n | n2 |

Abbreviation: HSQC = Heteronuclear Single Quantum Coherence
